1 **Promiscuous enzymes cooperate at the substrate level en**  
2 **route to lactazole A**

3 Alexander A. Vinogradov<sup>1</sup>, Morito Shimomura<sup>2</sup>, Naokazu Kano<sup>3</sup>, Yuki Goto<sup>1</sup>, Hiroyasu  
4 Onaka<sup>2,4</sup> and Hiroaki Suga<sup>1,\*</sup>

5 <sup>1</sup>Department of Chemistry, Graduate School of Science, The University of Tokyo,  
6 Bunkyo-ku, Tokyo 113-0033, Japan

7 <sup>2</sup>Department of Biotechnology, Graduate School of Agricultural and Life Sciences, The  
8 University of Tokyo, Bunkyo-ku, Tokyo 113-8657, Japan

9 <sup>3</sup> Department of Chemistry, Faculty of Science, Gakushuin University, 1-5-1 Mejiro,  
10 Toshima-ku, Tokyo 171-8588, Japan

11 <sup>4</sup>Collaborative Research Institute for Innovative Microbiology, The University of Tokyo,  
12 Bunkyo-ku, Tokyo 113-8657, Japan

13 \*Correspondence to Hiroaki Suga (Department of Chemistry, Graduate School of Science,  
14 The University of Tokyo, Bunkyo-ku, Tokyo 113-0033, Japan, +81-3-5841-8372,  
15 [hsuga@chem.s.u-tokyo.ac.jp](mailto:hsuga@chem.s.u-tokyo.ac.jp))

16

17 The authors declare no competing interests.

## 18 **Abstract**

19 Enzymes involved in ribosomally synthesized and post-translationally modified peptide  
20 (RiPP) biosynthesis often have relaxed specificity profiles and are able to modify diverse  
21 substrates. When several such enzymes act together during precursor peptide maturation,  
22 a multitude of products can form, and yet usually, the biosynthesis converges on a single  
23 natural product. For the most part, the mechanisms controlling the integrity of RiPP  
24 assembly remain elusive. Here, we investigate biosynthesis of lactazole A, a model  
25 thiopeptide produced by five promiscuous enzymes from a ribosomal precursor peptide.  
26 Using our *in vitro* thiopeptide production (FIT-Laz) system, we determine the order of  
27 biosynthetic events at the individual modification level, and supplement this study with  
28 substrate scope analysis for participating enzymes. Combined, our results reveal a  
29 dynamic thiopeptide assembly process with multiple points of kinetic control, intertwined  
30 enzymatic action, and the overall substrate-level cooperation between the enzymes. This  
31 work advances our understanding of RiPP biosynthesis processes and facilitates  
32 thiopeptide bioengineering.

## 33 Main text

34 Ribosomally synthesized and post-translationally modified peptides (**RiPPs**) are  
35 structurally and functionally diverse natural products united by a common biosynthetic  
36 logic.<sup>1</sup> Usually during RiPP maturation, biosynthetic enzymes utilize the N-terminal  
37 sequence of a ribosomally produced precursor peptide as a recognition motif (leader  
38 peptide; **LP**) and install post-translational modifications (**PTMs**) in the C-terminal section of  
39 the same substrate (core peptide; **CP**). This mode of action leads to relaxed substrate  
40 requirements around the modification sites, which is often exemplified by one RiPP  
41 enzyme introducing multiple PTMs in a single substrate. In one extreme case, a single  
42 enzyme epimerizes 18 out of 49 amino acids in polytheonamide A precursor peptide  
43 during its biosynthesis.<sup>2,3</sup> Unique enzymology of RiPP biosynthetic enzymes has come  
44 under intense scrutiny in the recent years, which explained observed substrate specificities  
45 in many cases.<sup>4,5,14,15,6-13</sup> During biosynthesis of complex RiPPs, when multiple enzymes  
46 capable of differentially modifying their substrate act together, a multitude of products can  
47 often form, and yet usually the biosynthetic pathway manages to produce a single natural  
48 product. Molecular mechanisms controlling the integrity of RiPP biosynthesis are only  
49 beginning to be elucidated,<sup>2,16-23</sup> and many details remain unclear, especially in the cases  
50 where enzymes can apparently compete over the substrate. For example, during  
51 biosynthesis of some thiopeptides, Ser and Thr residues in the precursor peptide CP are  
52 selectively modified to either oxazoline/oxazole or dehydroamino acids by  
53 cyclodehydratase/dehydrogenase and dehydratase enzymes, and the basis for such a  
54 cooperative action despite the potential for competition has not yet been firmly established.

55 In this study, we aim at investigating the roots of cooperative biosynthesis of lactazole A,  
56 a cryptic thiopeptide from *Streptomyces lactacystinaeus* (Fig. 1).<sup>24</sup> Lactazole biosynthesis  
57 involves 5 dedicated enzymes colocalized with the precursor peptide gene (*lazA*) into *laz*  
58 biosynthetic gene cluster (**BGC**; Fig. 1a-c). During thiopeptide maturation, LazD and LazE  
59 operate as a single cyclodehydratase enzyme,<sup>25-27</sup> responsible for the installation of  
60 azoline PTMs (Fig. 1d), which are further dehydrogenated to azoles by the C-terminal  
61 domain of LazF in an FMN-dependent manner.<sup>9,28</sup> Dehydroalanines (**Dha**) are accessed  
62 from Ser by the combined action of LazB and the N-terminal domain of LazF, which utilize  
63 glutamyl-tRNA<sup>Glu</sup> for dehydration similarly to class I lanthipeptide synthetases (Fig. 1e).<sup>29-32</sup>

64 The remaining enzyme, LazC, performs macrocyclization and eliminates LP as a C-  
65 terminal amide (**LP-NH<sub>2</sub>**) to yield the thiopeptide (Fig. 1f).<sup>33,34</sup>

66 Lactazole A is an example of a RiPP assembled by multiple enzymes that can compete  
67 over the substrate. LazA CP contains 6 Ser residues, 4 of which are converted into Dha, 1  
68 into oxazole (Oxz), and 1 which remains unmodified (Fig. 1b, c). Previously, we  
69 reconstituted biosynthesis of lactazole A *in vitro* by combining flexible in vitro translation  
70 (**FIT**)<sup>35</sup> — utilized to access LazA precursor peptide — with recombinantly produced Laz  
71 enzymes.<sup>36</sup> Using this platform, termed the FIT-Laz system, we showed that selective  
72 biosynthesis of lactazole A occurred only when all enzymes were present in the reaction  
73 mixture from the beginning, whereas stepwise treatments led to either under- or  
74 overdehydrated thiopeptides containing 3 or 5 Dha, respectively. These results suggest  
75 that cooperation between Laz enzymes extends beyond the “azoles form first, Dha second”  
76 model observed for thiopeptides studied to date,<sup>20,21,37</sup> and indicate that lactazole may be a  
77 good model system to study concerted action of multiple enzymes in RiPP biosynthesis.  
78 Furthermore, our previous findings<sup>36</sup> indicated that Laz enzymes can convert extensively  
79 mutated LazA analogs to corresponding thiopeptides, exemplified by the synthesis of over  
80 90 lactazole-like thiopeptide containing up to 25 nonnative amino acids. How the enzymes  
81 maintain the integrity of biosynthesis for a diverse set of substrates constitutes the second  
82 major question of this study.

83 According to our aims, we intercepted biosynthetic intermediates and reconstructed the  
84 order of events leading up to the final macrocyclization reaction during the lactazole A  
85 assembly process at a single PTM resolution. When supplemented with substrate  
86 preference studies for individual enzymes, these results help in rationalizing the roots of  
87 cooperation between Laz enzymes, and establish the basis for selective lactazole A  
88 production. Bioengineering of RiPPs to harness their potential for human health holds a lot  
89 of promise,<sup>38,39</sup> but it requires thorough understanding of the underlying biosynthesis  
90 mechanisms. Our study elucidates how several promiscuous enzymes coordinate the  
91 assembly of a complex RiPP, facilitating thiopeptide bioengineering, and ultimately,  
92 functional reprogramming.

93

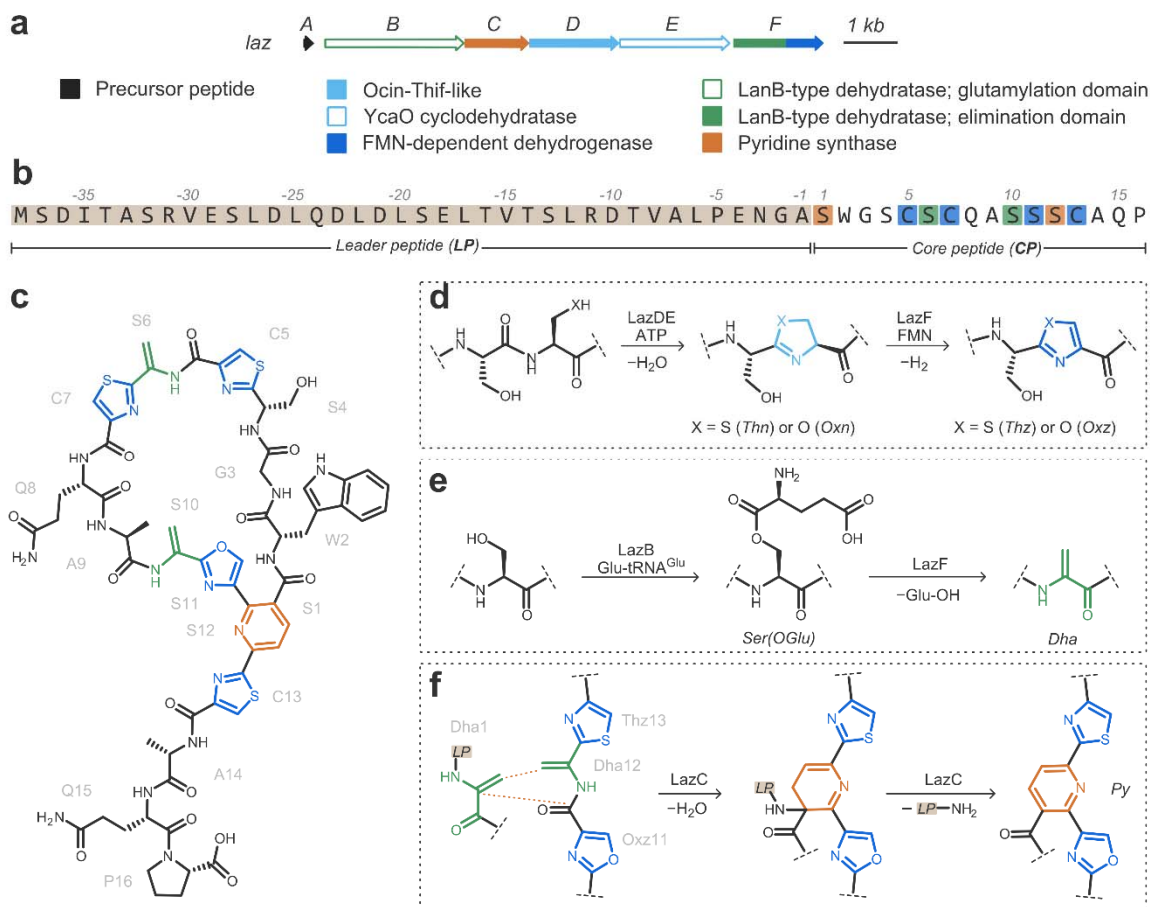

94

95 **Figure 1.** Biosynthesis of lactazole A. a) The biosynthetic gene cluster from *Streptomyces*  
 96 *lactacystinaeus* responsible for lactazole A production (*laz* BGC; GenBank accession:  
 97 AB820694.1; MIBIG accession: BGC0000606). Genes encoding the enzymes responsible  
 98 for synthesis of azolines are color coded in light blue, azoline dehydrogenase in blue,  
 99 dehydroalanine — green, and pyridine — orange. b) Primary amino acid sequence of LazA  
 100 precursor peptide. Residues eventually converted to Dha, azoles and pyridine are  
 101 highlighted in green, blue, and orange, respectively. c) Chemical structure of lactazole A.  
 102 d) LazDE performs a cyclodehydration reaction furnishing azoline heterocycles, which are  
 103 further dehydrogenated by FMN-dependent LazF. e) Ser dehydration is catalyzed by  
 104 LazBF via a two-step process involving Ser glutamylation by LazB. f) Macrocyclization is  
 105 achieved by LazC, which utilizes two Dha residues, Dha1 and Dha12, to form the central  
 106 dihydropyridine and concomitantly macrocyclize the peptide. The same enzyme  
 107 consequently eliminates LP-NH<sub>2</sub> to aromatize the structure.

108

## 109 Results

### 110 Biosynthetic timing

111 Because our previous results indicated that modification of amino acid residues 4–7 in  
112 the CP of LazA (Fig. 1b) is not essential for macrocyclization,<sup>36</sup> we hypothesized that  
113 maturation of LazA is modular, i.e. residues 10–13 undergo PTM independent of residues  
114 4–7. Accordingly, we sought to establish the order of PTM installation for two LazA  
115 mutants, LazA S4-C7A (**LazA<sup>min</sup>**; Fig. 2a) and LazA S10-C13A (**LazA<sup>aux</sup>**; Fig. 2b), before  
116 proceeding to the wild type peptide (**LazA<sup>wt</sup>**).

117 First, we investigated *in vitro* modification of LazA<sup>min</sup> utilizing the FIT-Laz system.<sup>36</sup>  
118 Synthetic DNA bearing *laza<sup>min</sup>* gene was *in vitro* transcribed and translated, generating the  
119 precursor peptide, which was incubated with a mixture of recombinantly produced  
120 enzymes (LazB, LazC, LazD, LazE, LazF, *Streptomyces lividans* GluRS and synthetic *S.*  
121 *lactacystinaeus* tRNA<sup>Glu</sup> (**LazBCDEF/GluRS/tRNA<sup>Glu</sup>**); S.I. 2.3) at 25 °C. Reactions were  
122 stopped by the addition of cold methanol containing iodoacetamide (**IAA**), and the  
123 outcomes were analyzed by LC-MS. Selective IAA alkylation on unmodified Cys residues  
124 and quantitative acidic hydrolysis of Oxn under HPLC conditions enabled unambiguous  
125 identification of PTMs based on mass shifts (S.I. 3.1), but not their location within the CP.  
126 Accordingly, the captured intermediates were further analyzed by CID tandem mass  
127 spectrometry (**MS/MS**) in a data-dependent acquisition (**DDA**) mode (S.I. 2.4-2.5). Our  
128 initial experiments showed that LazA<sup>min</sup> maturation is complete in under 3 h (Fig. S6). To  
129 intercept biosynthetic intermediates at a finer temporal resolution, we performed a time  
130 course study and quenched the reactions after 5, 15, 30, 45 and 60 min (Fig. 2a and S7).  
131 These experiments revealed formation and consumption of multiple linear intermediates  
132 during thiopeptide assembly, and enabled assignment of the PTM installation order (Fig.  
133 4a, S.I. 3.3).

134

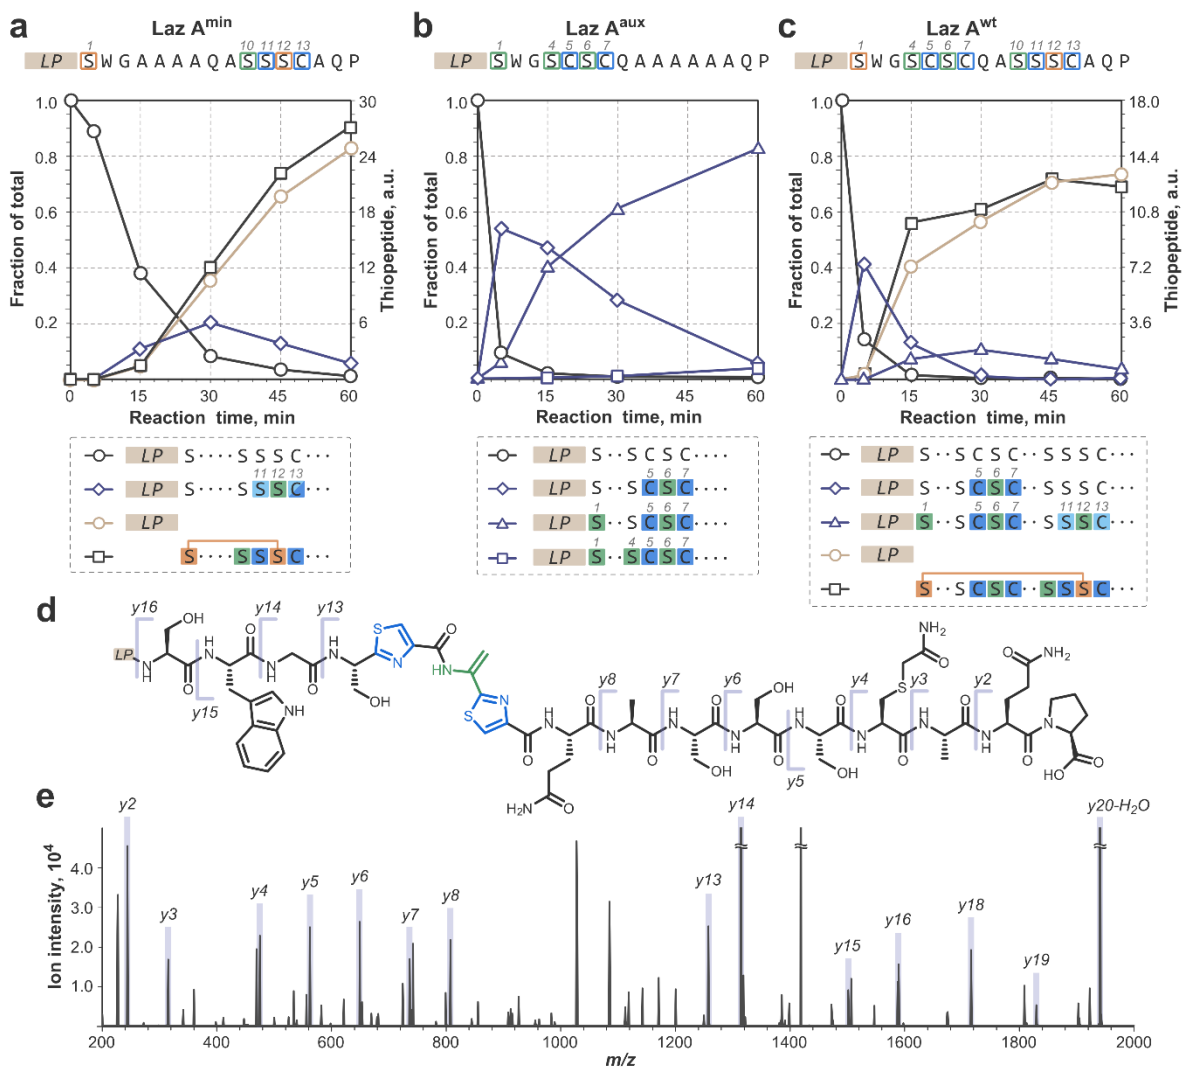

135

136 **Figure 2.** Time course analysis reveals the order of enzymatic action during lactazole A  
 137 assembly. a) LazA<sup>min</sup> maturation time course. In vitro translated precursor peptide was  
 138 incubated with LazBCDEF/GluRS/tRNA<sup>Glu</sup> for 5, 15, 30, 45 and 60 min, after which  
 139 reaction outcomes were analyzed by LC-MS and DDA MS/MS. Displayed are the changes  
 140 in the amounts of starting material (S.M.), LP-NH<sub>2</sub>, thiopeptide (lactazole S4-C7A) and the  
 141 key intermediate, Ser10-Oxn11-Dha12-Thn/Thz13, as a function of time. For full product  
 142 distribution and characterization of intermediates refer to S.I. 3.3. b) LazA<sup>aux</sup> maturation  
 143 time course; data as panel in a), except LazC was omitted from the enzyme mixture, and  
 144 the 45-min time point was skipped. Displayed are the changes in the amounts of S.M. and  
 145 three key products as a function of time. See also S.I. 3.4. c) Lactazole A biosynthesis time  
 146 course; data as panel in a). Maturation of LazA<sup>wt</sup> proceeds in a modular fashion: after a 5-  
 147 min treatment with Laz enzymes, the key Ser4-Thz5-Dha6-Thz7 intermediate accumulates  
 148 similarly to the LazA<sup>aux</sup> case (compare to panel b). Fast accumulation of this peptide points  
 149 to a modular biosynthetic logic. The second key intermediate, Thz5-Dha6-Thz7/Oxn11-  
 150 Dha12-Thn13, accumulates analogously to the LazA<sup>min</sup> case (compare to panel a). See  
 151 also S.I. 3.5. d) The chemical structure of the key Ser4-Thz5-Dha6-Thz7 LazA<sup>wt</sup>

152 intermediate observed after a 5-min treatment with the enzymes. e) MS/MS spectrum  
153 supporting structural assignment of the intermediate from panel d). See also Fig. S37.



154 Maturation of LazA<sup>min</sup> started with formation of oxazoline at Ser11 (Oxn11), followed by  
155 heterocyclization at Cys13 (Thn13; Fig. S10). After that, Ser12 was dehydrated to Dha12  
156 (Fig. S11), and Thn13 was dehydrogenated to give thiazole13 (Thz13; Fig. S15), arriving  
157 at a prominent intermediate, Ser10-Oxn11-Dha12-Thz13 (Fig. 2a). The following steps,  
158 Oxn11 dehydrogenation and Dha10 formation, happened fast relative to the temporal  
159 resolution of our experiments, and we were unable to capture the corresponding  
160 intermediates even when using diluted enzyme mixtures or performing reactions at 4°C  
161 (Fig. S16). The next observed peptide bore the Dha10-Oxz11-Dha12-Thz13 motif required  
162 for macrocyclization (Fig. S12). Dehydration of Ser1 to Dha1 was independent of other  
163 modifications, because most intermediates formed as a mixture of Ser1 and Dha1  
164 throughout the time course. Treatment of LazA<sup>min</sup> with LazBF/GluRS/tRNA<sup>Glu</sup> for 2 h  
165 confirmed that LazDE-independent dehydration of Ser1 is kinetically competent (Fig. S17).  
166 Additionally, the time course study indicated that LazBF dehydrates Ser adjacent to  
167 azolines. We confirmed the azoline-dependent activity of LazB by treating LazA<sup>min</sup> with the  
168 enzyme mix lacking dehydrogenase (LazBDE/GluRS/tRNA<sup>Glu</sup>; Fig. S18).

169 The order of Ser10 dehydration and Oxn11 dehydrogenation could not be determined  
170 from the time course. LazF can convert Oxn11 to Oxz11, but this process is kinetically  
171 incompetent. Although a 17 h treatment of LazA<sup>min</sup> with LazDEF yielded the Oxz11/Thz13  
172 product, an analogous 2 h reaction mainly resulted in the formation of Oxn11/Thz13 (Fig.  
173 3a). In contrast, a 2 h incubation of LazA<sup>min</sup> with LazBDEF/GluRS/tRNA<sup>Glu</sup> afforded fully  
174 modified Dha10-Oxz11-Dha12-Thz13, suggesting that Dha formation is required for facile  
175 oxidation of Oxn11. To test which Dha is important, we prepared two LazA<sup>min</sup> mutants,  
176 S10A and S12A, and treated them with LazBDEF/GluRS/tRNA<sup>Glu</sup> for 2 h. The S10A mutant  
177 yielded the Ala10-Oxn11-Dha12-Thz13 peptide (Fig. 3b), and modification of LazA<sup>min</sup> S12A  
178 led to a complex mixture of products, none of which bore Dha10 and/or Oxz11 (Fig. 3c).  
179 These results suggest that installation of Dha12 is required for dehydration of Ser10, and  
180 in turn, Dha10 greatly facilitates dehydrogenation of Oxn11. Thus, during LazA<sup>min</sup>  
181 maturation, the key intermediate Ser10-Oxn11-Dha12-Thz13 is converted to Dha10-  
182 Oxn11-Dha12-Thz13, which sets the stage for Oxn11 oxidation and the follow-up  
183 macrocyclization (Fig. 4a). The elusive Dha10-Oxn11-Dha12-Thz13 intermediate could be  
184 captured for LazA<sup>min</sup> S11T treated with LazBCDEF/GluRS/tRNA<sup>Glu</sup> for 2 h (Fig. S19).

185 To test whether this curious sequence of events has biosynthetic significance, we forced  
186 oxidation of Oxn11 prior to adding LazB to the reaction mixture. A 17 h treatment of  
187 LazA<sup>min</sup> with LazDEF furnished the Oxz11/Thz13 product, which upon further incubation  
188 with LazBCF/GluRS/tRNA<sup>Glu</sup> for 2 h accumulated the Ser10-Oxz11-Dha12-Thz13  
189 intermediate, and a mixture of thiopeptides bearing either Ser10 or Dha10 (Fig. S20).  
190 Similarly, LazA<sup>min</sup> S11C, readily modified by LazDEF to the Thz11/Thz13 intermediate,  
191 underwent slow dehydration at Ser10 and formed a mixture of thiopeptides (Fig. S21).  
192 These results indicate that premature oxidation of Oxn11 hampers Dha10 formation, and  
193 highlight the importance of Dha-dependent Oxn11 dehydrogenation during the  
194 biosynthesis. Lastly, we found that the order of modifications described here persisted for  
195 three LazA<sup>min</sup> variants, although maturation speed and efficiency varied between the  
196 mutants (Fig. S22). The Ser10-Ser11-Ser12-Cys13 motif is conserved in over 60  
197 thiopeptides from predicted lactazole-like BGCs (Fig. S23),<sup>40</sup> which lends further support to  
198 our findings.

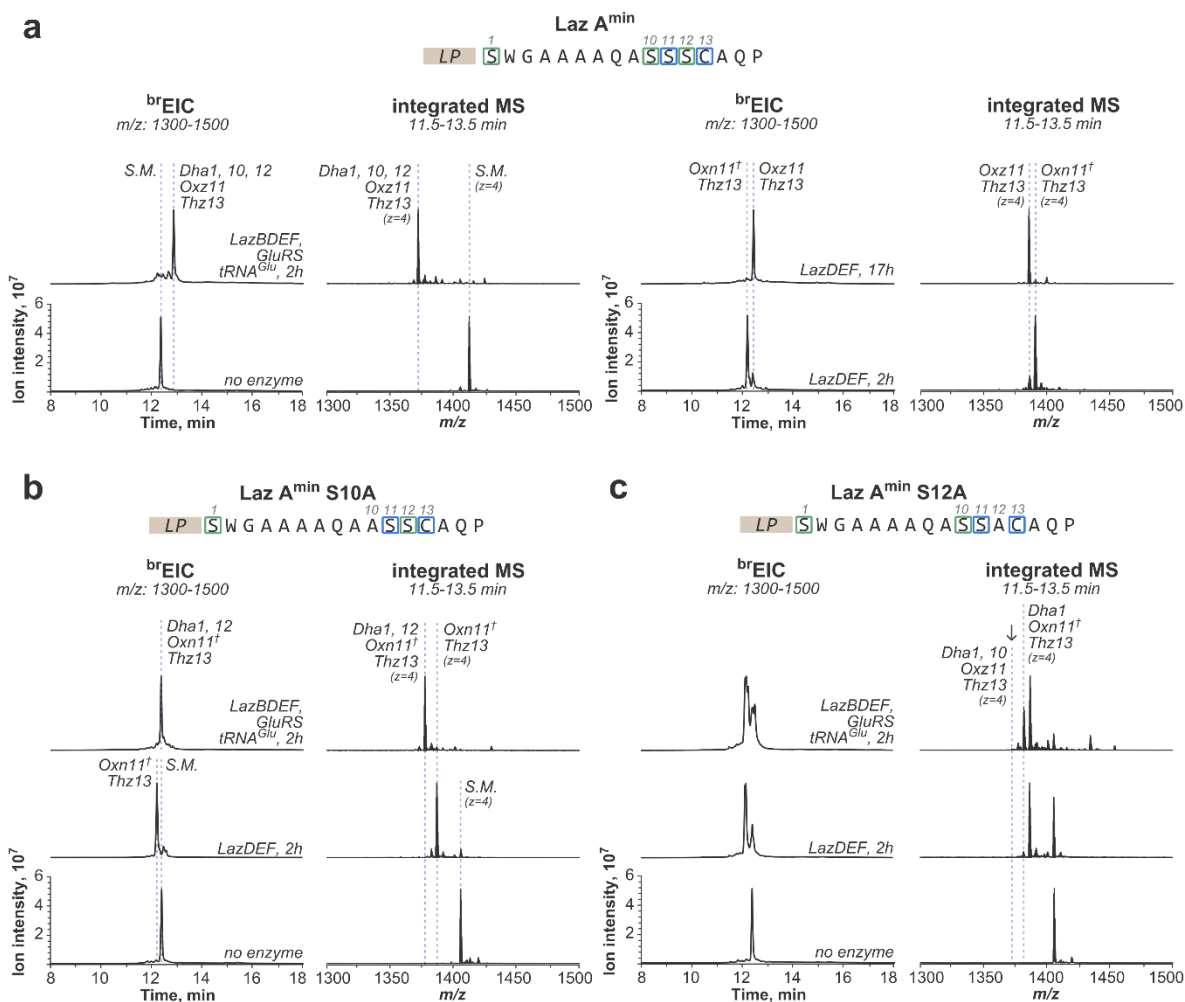

199

**Figure 3.** Both Dha10 and Dha12 are required for facile Oxyn11 dehydrogenation. a) Dha-dependent Oxyn11 dehydrogenation in LazA<sup>min</sup>. In vitro translated LazA<sup>min</sup> was incubated with LazBDEF/GluRS/tRNA<sup>Glu</sup> (2 h), LazDEF (2 h or 17 h) or with buffer only, and the outcomes were evaluated by LC-MS. Displayed are <sup>br</sup>EIC chromatograms and integrated mass spectra showing the product distribution. These data suggest that in the absence of LazB, LazF-mediated dehydrogenation of Oxyn11 is kinetically incompetent. b) Kinetically incompetent Oxyn11 dehydrogenation in LazA<sup>min</sup> S10A. Analogous to panel a), data for LazA<sup>min</sup> S10A. In the absence of Dha10, Oxyn11 oxidation does not happen on a relevant time scale. c) Kinetically incompetent Oxyn11 dehydrogenation in LazA<sup>min</sup> S12A. Analogous to panel a), data for LazA<sup>min</sup> S12A. The S12A mutation disrupts azoline installation by LazDE and leads to formation of multiple products. Nevertheless, when the peptide was treated with LazBDEF/GluRS/tRNA<sup>Glu</sup> for 2 h, neither Dha10 formation nor Oxyn11 dehydrogenation took place, suggesting that Dha12 is required for dehydration of Ser10. †: Oxyn underwent quantitative hydrolysis during HPLC (see S.I. 3.1 and 3.2).

214 Next, we studied modification of LazA<sup>aux</sup>. Analogous to the experiments above, LazA<sup>aux</sup>  
215 precursor peptide was incubated with LazBDEF/GluRS/tRNA<sup>Glu</sup> for 5, 15, 30 and 60 min,  
216 and reaction outcomes were analyzed by LC-MS and DDA MS/MS (Fig. 2b and S.I. 3.4).  
217 Heterocyclization at Cys5 initiated the chain of PTMs, which then briefly bifurcated and  
218 converged on the key product, Ser4-Thz5-Dha6-Thz7, bearing the wild type modification  
219 pattern (Fig. 4b). This sequence of events was fast — the key intermediate comprised over  
220 50% of total substrate after only 5 min. As before, dehydration of Ser1 to Dha1 was  
221 independent of other PTMs, and was generally slow compared to the modifications at  
222 residues 5–7, taking over 1 h to completion. Even slower was dehydration of Ser4 to Dha4  
223 inside the Ser4-Thz5-Dha6-Thz7 motif, as this product comprised less than 4% of total  
224 substrate after 1 h. These results confirm that Ser inside the Ser-azole-Dha-azole pattern  
225 is a poor substrate for LazBF.

226 Finally, we performed time course analysis for LazA<sup>wt</sup> (Fig. 2c; S.I. 3.5). As anticipated,  
227 biosynthesis proceeded largely in a modular fashion (Fig. 4c). The key intermediate of  
228 LazA<sup>aux</sup> maturation, Ser4-Thz5-Dha6-Thz7, also quickly formed for LazA<sup>wt</sup> and comprised  
229 over 40% of total substrate after a 5-min incubation with the full enzyme set (Fig. 2c–e).  
230 The biosynthetic order leading up to this peptide was identical to LazA<sup>aux</sup>, including the  
231 bifurcation event. Modification of residues 10–13 proceeded once the Ser4-Thz5-Dha6-  
232 Thz7 motif was installed. With the exception of Ser12 dehydration, which took place prior  
233 to the heterocyclization of either residue around it (Fig. S38), modification of residues 10–  
234 13 generally followed the sequence established for LazA<sup>min</sup>, including the Dha-dependent  
235 Oxn11 dehydrogenation.

236 Altogether, these experiments unravel lactazole A biosynthesis one PTM at a time,  
237 revealing a carefully orchestrated sequence of events, in which the actions of different  
238 enzymes are intertwined to ensure the integrity of biosynthesis.

239

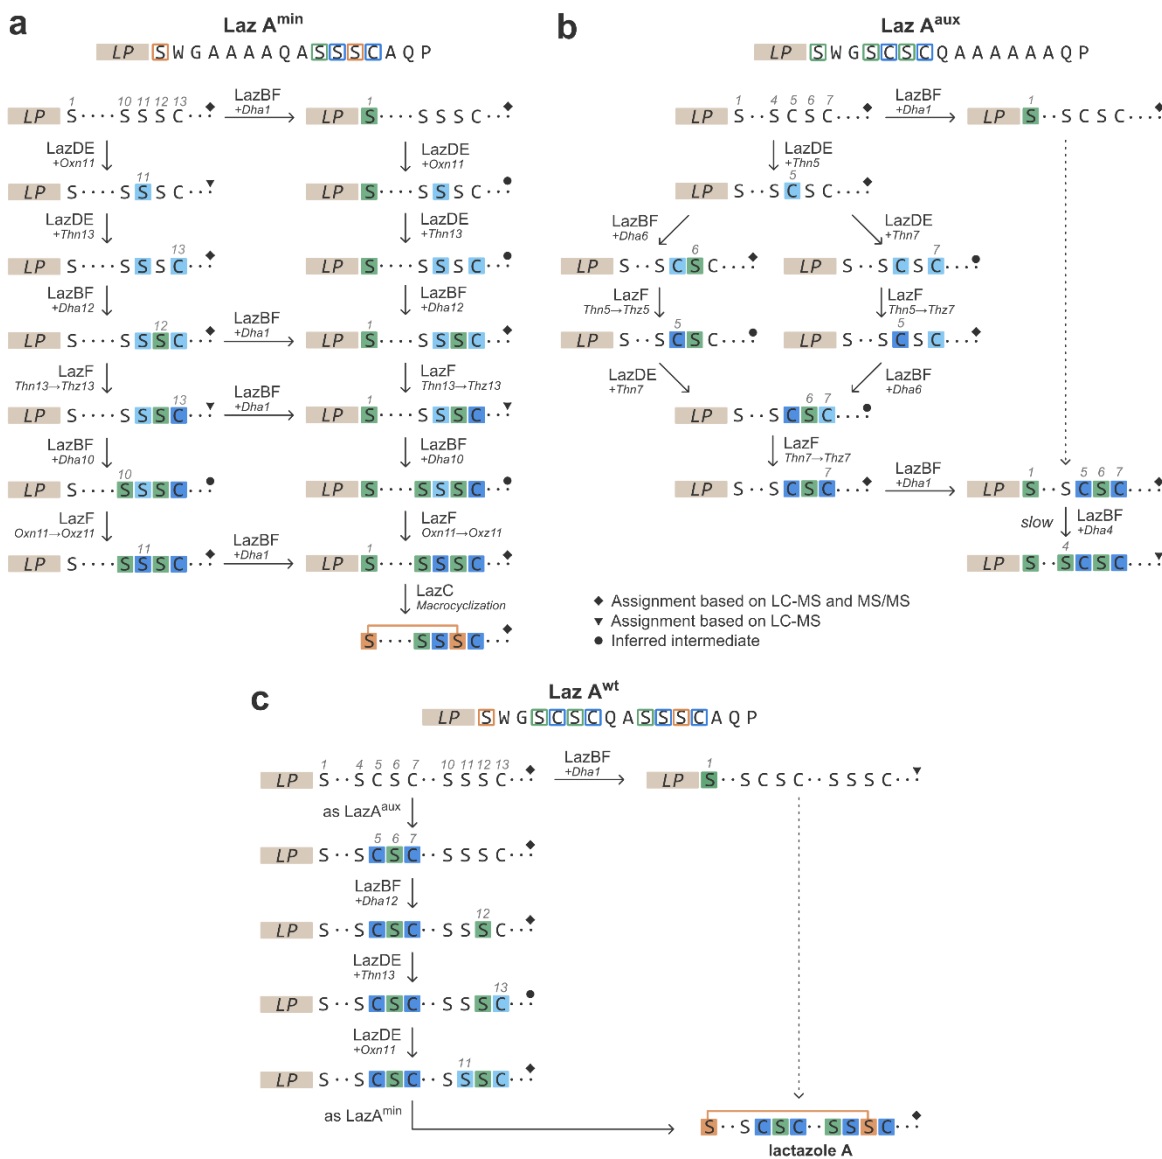

240

241 **Figure 4.** Proposed lactazole A biosynthesis pathways. a) The order of PTM installation for  
 242 LazA<sup>min</sup>. b) Modification of residues 4–7 as studied in LazA<sup>aux</sup>. c) Modular assembly of  
 243 lactazole A from LazA<sup>wt</sup>. See also S.I. 3.3 – 3.5.

## 244 Substrate specificity

245 Primary macrocycle assembly for thiopeptides studied to date separates azole and Dha  
246 formation into two stages, where Dha installation follows azole formation.<sup>20,21,37</sup> Such a  
247 separation can be due to the specificity of a Dha-installing enzyme toward the native azole  
248 pattern,<sup>20</sup> or due to an additional enzyme acting as a gatekeeper and preventing premature  
249 Dha synthesis.<sup>21,37</sup> Intertwined enzymatic action observed in the experiments above is  
250 distinct from these models, indicating that lactazole biosynthesis integrity is maintained  
251 differently. The time course study revealed some of these mechanisms (for instance, Dha-  
252 dependent dehydrogenation at Oxn11 serving to prevent formation of underdehydrated  
253 thiopeptides), but some issues, especially the nature of enzyme competition over Ser  
254 residues, remained elusive. To gain deeper insight into the nature of cooperation and  
255 competition during lactazole biosynthesis, we performed analysis of individual enzymes  
256 and their innate substrate preferences. To this end, we sought to dissect and narrow down  
257 the substrate recognition requirements for each enzyme.

258 **LazDE (azoline formation).** Because the action of LazDE is mostly independent of other  
259 enzymes, characterization of its substrate scope is relatively straightforward. First, we  
260 investigated whether any specific sequence elements in LazA CP are critical for LazDE  
261 activity, and prepared 4 LazA variants bearing randomized CPs with an Ala-Cys-Ala  
262 tripeptide grafted in the middle (Fig. 5a, LazA<sup>CP1-4</sup>). The peptides, produced with the FIT  
263 system, were incubated with LazDEF for 2 h, and reactions were analyzed by LC-MS.  
264 Efficient modification of 3 out of 4 tested substrates (Fig. 5a, LazA<sup>CP1-3</sup>) indicated that  
265 LazDE is a promiscuous enzyme able to act in “unfamiliar” sequence environments. Next,  
266 we studied relative heterocyclization rates for Cys vs. Ser and Thr. Consistent with a  
267 number of previously characterized YcaO enzymes,<sup>41-43</sup> modification efficiency decreased  
268 from Cys to Thr to Ser (Fig. 5a, LazA<sup>CP1</sup>, LazA<sup>CP1</sup> C7T, LazA<sup>CP1</sup> C7S). Heterocyclization of  
269 Ser/Thr in sequences bearing a Thz in position +2 proceeded similarly (Fig. S42a).

270 The structure of lactazole A does not contain adjacent azoles, and even a prolonged  
271 incubation of LazA<sup>wt</sup> with LazDEF does not result in consecutive heterocyclizations. To test  
272 whether LazDE is unable to form consecutive azoles, we prepared two substrates  
273 containing 2 or 3 Cys in a row (Fig. 5a; LazA<sup>CP1</sup> 2C and LazA<sup>CP1</sup> 3C). Treating these  
274 peptides with LazDEF led to one or two cyclodehydrations respectively, supporting our

275 hypothesis. In contrast, substrates containing up to 4 Cys residues all separated by an Ala  
276 (Fig. S42b) resulted in formation of Thz at every Cys residue.

277 To ascertain whether the distance from the LP to the cyclizable amino acid affects  
278 modification rate, we prepared 4 LazA variants containing a single Cys in position 2, 4, 6 or  
279 8 (Fig. S42e). LazA<sup>LP ruler Cys2</sup> was unmodified after a 30-min treatment with LazDEF,  
280 suggesting that similar to PatD, a YcaO enzyme from a cyanobactin BGC,<sup>42,44</sup> LazDE  
281 requires a spacer sequence between LP and residues undergoing modification, which  
282 explains how Ser1 escapes cyclodehydration. LazA<sup>LP ruler Cys4</sup> and LazA<sup>LP ruler Cys6</sup> gave over  
283 80% Thz product compared to the 28% heterocyclization yield for LazA<sup>LP ruler Cys8</sup>, indicating  
284 that reaction rate decreases with distance from the LP, which rationalizes fast modification  
285 of Cys5 and Cys7 relative to Ser11 and Cys13 in LazA<sup>wt</sup>.

286 Finally, we studied the effect of amino acids adjacent to the cyclodehydration site using  
287 12 single-point mutants of LazA<sup>CP1</sup> (Fig. 5a). In position +1 (Cys-Xaa), LazDE preferred  
288 small/hydrophobic residues such as Ala, Ser, Gly and Val, while modification next to  
289 charged Asp and Arg as well as bulky Trp was impaired. In position -1, Ser or Ala were  
290 strongly preferred, while other mutants suffered from inefficient processing. In addition, we  
291 also grafted “native” tripeptides from LazA<sup>wt</sup> into LazA<sup>CP1</sup>, and compared their relative  
292 modification rates after a 30-min treatment with LazDEF (Fig. S42d). These data  
293 uncovered a preference for Ser over Ala in position -1. The selectivity for Ser in position -  
294 1 was especially apparent for Ser-Ser motifs. Whereas the Ala-Ser-Ala substrate remained  
295 essentially unmodified after a 2 h treatment with LazDEF, Ser-Ser-Ala and Ser-Ser-Ser  
296 peptides were quantitatively cyclodehydrated under the same conditions (Fig. S42c).  
297 Altogether, this study narrows down the primary recognition sequence of LazDE to the  
298 tripeptide Xaa<sub>1</sub>-(Cys/Thr/Ser)-Xaa<sub>2</sub>, where small Ser, Ala and Gly residues are strongly  
299 preferred in Xaa<sub>1</sub> and Xaa<sub>2</sub> positions, and Cys is modified faster than Thr and Ser (Fig. 6a).

300

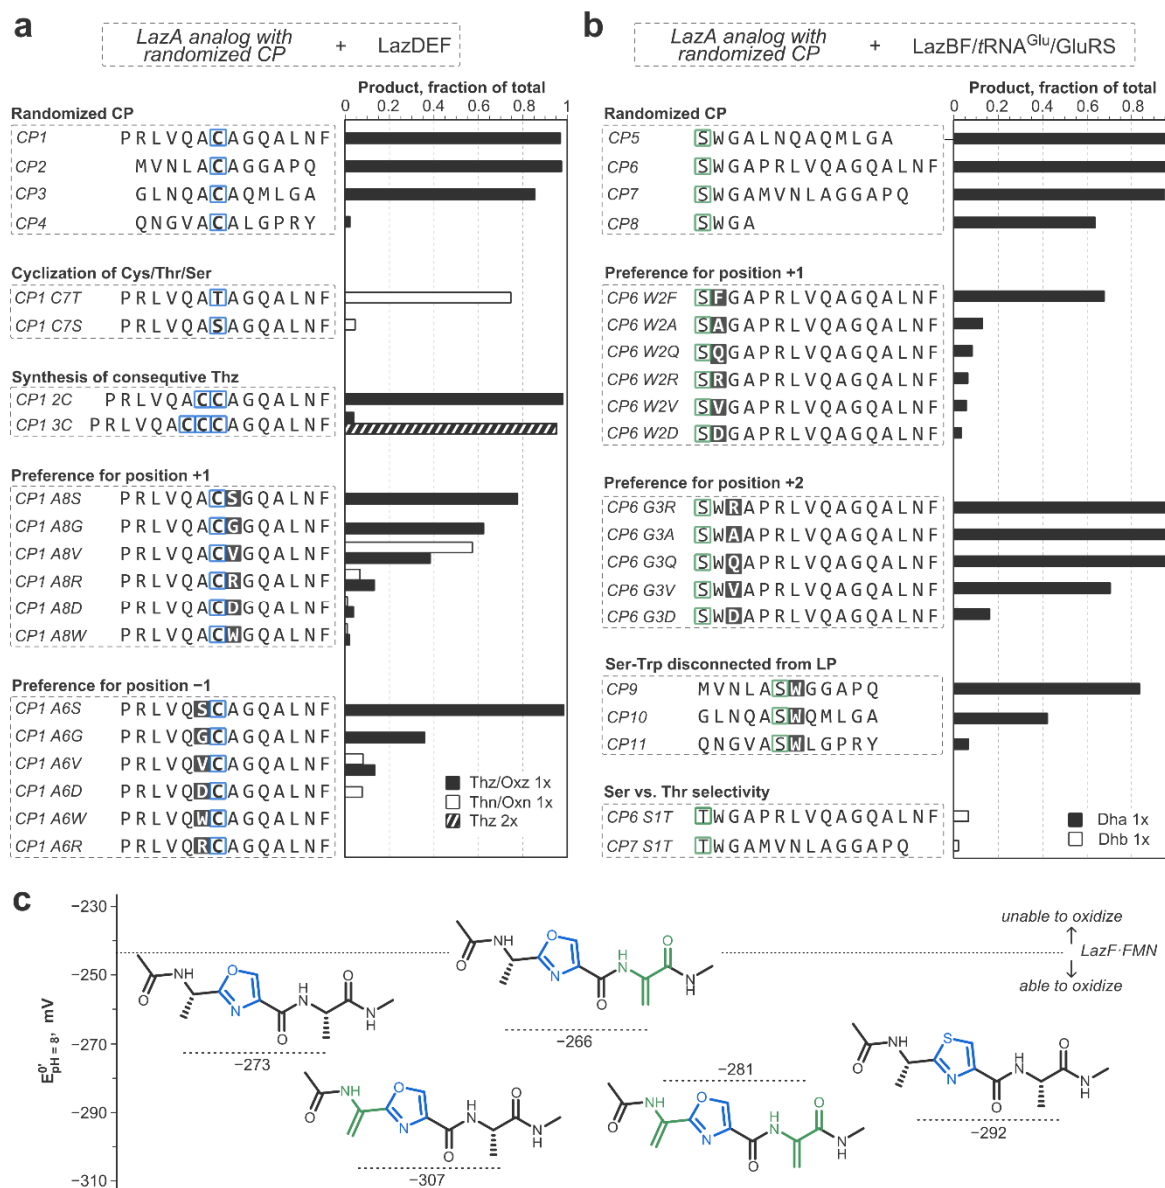

301

302 **Figure 5.** Substrate scope of LazDE (panel a), LazF dehydrogenase (panels a and c), and  
 303 LazBF (panel b). a, b) In vitro translated LazA analogs with randomized CP sequences  
 304 were incubated with either LazDEF (panel a) or LazBF/GluRS/tRNA<sup>Glu</sup> (panel b) for 2 h.  
 305 Reaction outcomes were analyzed by LC-MS and quantified as described in S.I. 2.5. The  
 306 data reveal substrate preferences for individual Laz enzymes. The data for additionally  
 307 tested substrates are summarized in Fig. S42. c) Comparison of the reduction potentials  
 308 between LazF and several Oxz/Thz-containing tripeptides. The values for tripeptides were  
 309 calculated as described in S.I. 2.6; for LazF — experimentally determined as described in  
 310 S.I. 2.7 and Fig. S45. The oxidizing ability of LazF-bound FMN is sufficient to  
 311 dehydrogenate all studied substrates, but the reaction potential increases when Dha flanks  
 312 the substrate Oxn in position -1, i.e. Dha in position -1 promotes Oxn dehydrogenation.



313 **LazBF (Dha formation)** has a two-fold activity profile. During lactazole biosynthesis, it  
314 converts Ser1 to Dha1 in an azoline/azole-independent fashion, while formation of  
315 remaining 3 Dha is azoline/azole dependent. We first focused on a more tractable  
316 azoline/azole-independent activity. As before, we began by preparing 3 LazA analogs with  
317 randomized CPs and grafted a Ser1-Trp2-Gly3-Ala4 tetrapeptide adjacent to the LP for  
318 each sequence (Fig. 5b; LazA<sup>CP5-7</sup>); one more substrate had the CP truncated after Ala4  
319 (Fig. 5b; LazA<sup>CP8</sup>). The peptides were produced with the FIT system and treated with  
320 LazBF/GluRS/tRNA<sup>Glu</sup> for 2 h. Efficient dehydration of all substrates, including the  
321 truncated peptide, indicated that LazBF is also a promiscuous enzyme that acts “locally”,  
322 i.e. it recognizes at most a few amino acids around the modification site. To further narrow  
323 down the recognition requirement, we prepared a series of single point mutants of LazA<sup>CP6</sup>  
324 in positions 2 and 3 (Fig. 5b). In position +1, an aromatic residue was essential for good  
325 modification efficiency, although residual dehydration occurred in all cases. Position +2  
326 tolerated more variation, and only a negatively charged Asp compromised processing.  
327 Additionally, we found that LazA mutants bearing a randomized CP with Ala-Ser-Trp  
328 grafted in the middle also underwent LazBF-catalyzed dehydration (Fig. 5b; LazA<sup>CP9-11</sup>),  
329 indicating that proximity to the LP is not a critical recognition element. Finally, we checked  
330 whether LazBF can accept Thr as a substrate to generate dehydrobutyrine (**Dhb**) residues.  
331 After a 2 h treatment, two Thr-containing substrates (Fig. 5b; LazA<sup>CP6</sup> S1T and LazA<sup>CP7</sup>  
332 S1T) were 7% and 3% modified, suggesting that LazBF strongly prefers Ser as a substrate,  
333 although synthesis of Dhb is possible. Combined, these results narrow down the primary  
334 recognition sequence of the azoline/azole-independent LazBF activity to the Ser-Trp  
335 dipeptide (Fig. 6a).

336 The substrate requirements for the azoline/azole-dependent Dha formation proved more  
337 difficult to generalize. First, we studied modification of single point Ala mutants of LazA<sup>min</sup>  
338 and LazA<sup>aux</sup> by LazBDEF/GluRS/tRNA<sup>Glu</sup> using LazBF/GluRS/tRNA<sup>Glu</sup> and LazDEF  
339 treatments as controls to gauge LazDE-dependent Dha formation (Fig. S43a, b). We found  
340 that Thz-Ser, Oxn-Ser-Thn/Thz, and Ser-Oxn-Dha-Thz motifs were generally dehydrated,  
341 but Ser-Thz, Oxn-Ser, Ser-Oxn, or Ser-Thz-Dha-Thz motifs were poor substrates (Fig. 6a).  
342 Processing of randomized CPs containing similar local environments recapitulated these  
343 findings (Fig. S43c, S44). However, based on these results, we were unable to generalize  
344 the rules governing Ser dehydration around azole/azolines: it is an intricately controlled

345 activity, which would require a dedicated study. Nevertheless, these results help in  
346 rationalizing slow dehydration of Ser4 in Ser4-Thz5-Dha6-Thz7 motif during lactazole  
347 biosynthesis.

348 Notably, throughout the study, the product of LazB action, Ser(OGLu), was not detected  
349 so long as LazF was present in the enzyme mixture. This observation suggests that the  
350 burden of substrate discrimination lies primarily on LazB, because LazF appears to accept  
351 any Ser(OGLu)-containing peptide as a substrate.

352 **LazF dehydrogenase (azole formation).** The aforementioned LazDE study provided a  
353 number of clues to the substrate scope of LazF dehydrogenase. First, like other Laz  
354 enzymes, LazF acts in unfamiliar sequence environments. The enzyme prefers small side  
355 chains such as Ala, Ser and Gly, on either side of the substrate azoline (Fig. 5a; Fig. 6a),  
356 and dehydrogenation of Thn happens much faster than Oxn or 5-MeOxn. Only one Oxn  
357 substrate not flanked by a Dha (Fig. S42c, LazA<sup>CP1</sup> 2S) underwent up to 20%  
358 dehydrogenation after 2 h.

359 LazF-mediated dehydrogenation of Oxn11 emerged as the key step of lactazole  
360 biosynthesis, and thus, we sought to explore it in greater detail. How does Dha facilitate  
361 Oxn dehydrogenation given a relaxed specificity profile of LazF and its strong preference  
362 for Thn? We hypothesized that  $\pi$ -conjugation between the double bond of Dha in position  
363 -1 and the  $\pi$ -system of substrate Oxn may tune its reduction potential and facilitate  
364 dehydrogenation. To see whether this hypothesis is plausible, we calculated reduction  
365 potentials for several Oxz and Thz-containing tripeptides flanked by Dha or Ala on either  
366 side of the heterocycle (Fig 5c). We utilized density functional theory at the B3LYP level of  
367 theory and used the 6-311+G(d) basis set following previously established methods (S.I.  
368 2.6).<sup>45-47</sup>

369 According to our calculations, Ala-Oxz-Ala had  $E^0 = -273$  mV (pH 8), some 19 mV above  
370 a Thz analog, consistent with the notion that Thn undergoes dehydrogenation easier than  
371 Oxn.<sup>48</sup> We also found that an Ala to Dha substitution in position -1 for an Oxz-containing  
372 peptide lowers its reduction potential by 34 mV, suggesting that the Dha-Oxn motif  
373 undergoes dehydrogenation easier than Ala-Thn. Dha in position +1 had a minor effect,  
374 and a tripeptide Dha-Oxz-Dha had  $E^0 = -281$  mV (pH 8), halfway between Ala-Thz-Ala  
375 and Ala-Oxz-Ala. These data support our original hypothesis. To see whether these

376 calculations are in line with the dehydrogenation ability of LazF, we experimentally  
377 determined reduction potential for LazF-bound FMN following a modified method of  
378 Massey,<sup>49,50</sup> and established  $E^{0'} = -244 \pm 1$  mV (pH 8; Fig. S45, S.I. 2.7). This value  
379 indicates that LazF-bound FMN provides sufficient oxidizing power to dehydrogenate all  
380 studied substrates, but the reaction potential increases from Ala-Oxn-Ala to Dha-Oxn-Dha  
381 to Ala-Thn-Ala, which helps in explaining Dha-dependent acceleration of Oxn oxidation. A  
382 similar mechanism might be at play during oxidation of Thn7. A Thn inside the Ala-Thn-Gln  
383 motif (Fig. S43a) was not dehydrogenated on a 30-min time scale, but during maturation of  
384 LazA<sup>aux</sup> and LazA<sup>wt</sup>, an intermediate Thz5-Dha6-Thn7-Gln8 was too fast-lived to be  
385 captured.

386 The reduction potential determined here matches well with FMN-dependent azoline  
387 dehydrogenases from other RiPP classes,<sup>51</sup> indicating that electrochemically LazF is not  
388 unique. Although Oxz-containing thiopeptides are not common, a number of such  
389 structures have been characterized.<sup>25,52,53</sup> Most Oxz in thiopeptides, especially those in  
390 berninamycin-like structures,<sup>54</sup> are flanked by a Dha residue in position -1 (Fig. S46),  
391 suggesting that Dha-assisted Oxn dehydrogenation may be a general phenomenon in  
392 biosynthesis of Dha/Oxz-containing natural products.

393 **LazC (macrocyclization).** Even though we did not study LazC in isolation, a number of  
394 results clarify its function during lactazole assembly. First, LazC-catalyzed  
395 macrocyclization is fast compared to other Laz enzymes: during the time course studies,  
396 the macrocyclization substrate, LazA Dha1/Dha10-Oxz11-Dha12-Thz13 never  
397 accumulated to over 5% of total (Table S1, S3). Conversely, maturation of a LazA<sup>min</sup>  
398 variant containing 5 mutations in the CP (Fig. S22c) stalled due to inefficient LazC action,  
399 with the macrocyclization precursor peptide comprising over 70% of total after a 3 h  
400 incubation. These data suggest that LazC might be more sensitive to the overall substrate  
401 structure than other Laz enzymes.

402 More importantly, LazC exerts kinetic control over lactazole assembly. The minimal  
403 recognition requirement around the 4 $\pi$  component of LazC (Oxz11-Dha12) ensures that  
404 as soon as Dha10-Oxz11-Dha12-Thz13 modifications are installed, macrocyclization will  
405 terminate the biosynthesis. This checkpoint controls the fate of Ser4, which in the absence

406 of LazC is slowly dehydrated by LazBF. When LazC is present in the enzyme mixture, it  
407 macrocyclizes the substrate before this dehydration happens.  
408

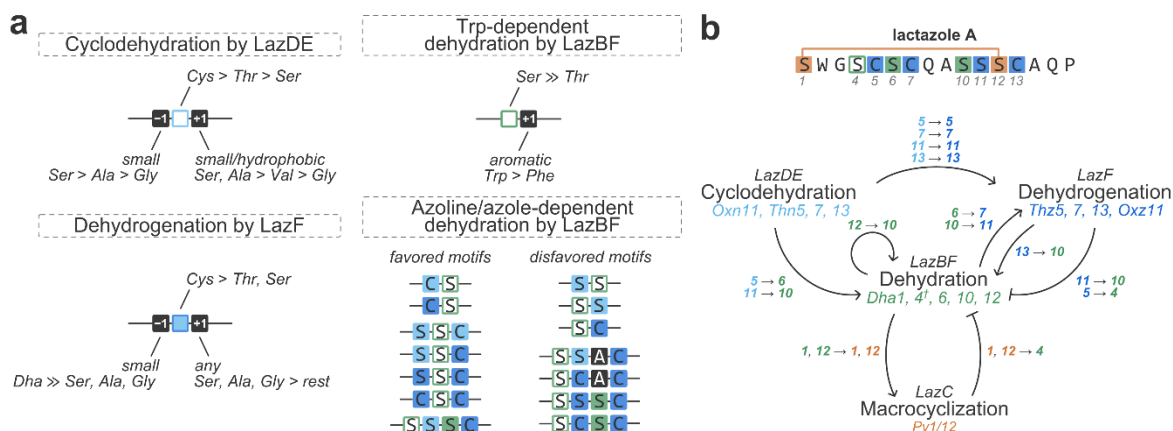

409

410 **Figure 6.** Dissection of lactazole biosynthesis. a) Summary of innate substrate  
 411 preferences of LazDE, LazF dehydrogenase, and both LazBF Trp-dependent and  
 412 azoline/azole-dependent modes of actions. Laz biosynthetic enzymes are in general  
 413 characterized by “local” action, and require short 1–3 amino acid-long motifs for activity. b)  
 414 Observed interactions between enzymatic activities in lactazole A biosynthesis. Pointed-  
 415 end arrows indicate activation/promotion of the recipient activity at specified residues of  
 416 LazA<sup>wt</sup> CP (for instance, cyclodehydration at residue 5 enables dehydrogenation at residue  
 417 5, or dehydration at Ser12 promotes dehydration at Ser10). Blunt-end arrows indicate  
 418 inhibition (in the broad meaning of the word) of the recipient activity at specified positions  
 419 (for example, macrocyclization utilizes residue 1 and 12 and prevents dehydration of Ser4).  
 420 †Although Ser4 is not dehydrated in wild type lactazole A, formation of Dha4-lactazole is  
 421 possible as discussed elsewhere in the text. This analysis visualizes the central role of  
 422 LazBF during lactazole biosynthesis.

423

## 424 Discussion

425 To the best of our knowledge, this study maps a multienzyme biosynthesis process of a  
426 RiPP at a single PTM resolution for the first time. Our results provide important clues on  
427 how Laz enzymes maintain integrity of lactazole assembly.

428 LazBF dehydrates 4 out of 6 Ser in the CP of LazA<sup>wt</sup>, and, as we previously found,<sup>36</sup>  
429 depending on the order of enzyme addition, over- and underdehydrated thiopeptides  
430 bearing 5 or 3 Dha respectively can also be produced, hinting at a deep-seated  
431 cooperation between Laz enzymes. The results of this work reveal the extent of this  
432 cooperation. Coordination of the dehydratase activity emerges as the central theme of  
433 lactazole biosynthesis, and every enzyme is involved in the regulation of LazBF-mediated  
434 Dha synthesis (Fig. 6b). Innate substrate preferences of LazDE — specifically, its inability  
435 to cyclize amino acids adjacent to azoline/azoles, selectivity for Ser in position -1, and  
436 preference of Cys over Ser as substrate — discriminate a single Ser residue (Ser11) for  
437 cyclodehydration, leaving the remaining five Ser as potential LazBF substrates.  
438 Concomitantly, cyclodehydration of Cys5, 7 and 13 prepares Ser4, 6, 10 and 12 for  
439 azoline/azole-dependent dehydration. LazF dehydrogenase exerts a finer level control,  
440 promoting dehydration at Ser10 and impeding facile Dha synthesis at Ser4 through  
441 dehydrogenation of Thn13 and Thn5, respectively. Coupling of dehydrogenation to Dha  
442 formation, observed during the oxidation of Dha6-Thn7 and Dha10-Oxn11-Dha12-Thz13  
443 motifs, serves as another important control mechanism, as it accelerates the biosynthesis  
444 and ensures that Dha10 is installed prior to LazC-catalyzed macrocyclization, preventing  
445 formation of the underdehydrated thiopeptide. Finally, through macrocyclization and LP  
446 cleavage, LazC emerges as a kinetic regulator of biosynthesis, restricting the action of  
447 LazBF at Ser4, which would otherwise be slowly dehydrated to Dha4. These control  
448 mechanisms are tightly coupled to the substrate preferences of LazBF, which — despite its  
449 apparent promiscuity — evolved to accurately sense PTMs introduced by other enzymes.

450 “Local” action also characterizes other Laz enzymes (Fig. 6a). Their primary substrate  
451 requirements may be narrowed down to 1–3 amino acids around the modification site,  
452 which allow them to act multiple times during lactazole biosynthesis and explain previously  
453 observed successful modification of substrates with extensively mutated CPs. The local  
454 action of the enzymes also explains the unusual punctuation of LazDE-mediated

455 cyclizations by LazBF-catalyzed dehydrations and azoline dehydrogenation throughout the  
456 process: every enzyme acts as soon as it finds a substrate in a suitable local environment,  
457 regardless of the overall modification pattern. Nevertheless, enzymatic activities are tuned  
458 to the substrate, and with the exception of Ser1 dehydration, *in vitro* lactazole biosynthesis  
459 proceeds through a unified pathway, allowing a brief bifurcation during modification of Ser6  
460 and Cys7.

461 Our results can explain lactazole biosynthesis without invoking a supramolecular enzyme  
462 complex, sometime hypothesized for thiopeptide assembly<sup>55</sup> and often observed during  
463 biosynthesis of other RiPPs,<sup>18,55,56</sup> although a possibility of such a complex is not ruled out.  
464 Instead, it appears that the enzymes communicate with each other via the substrate, and  
465 interactions between installed PTMs influence the assembly process in a major way. Such  
466 substrate-assisted assembly is emerging as a general phenomenon in RiPPs  
467 biosynthesis.<sup>5,57</sup>

468 Despite apparent structural similarities between thiopeptides, their biosynthetic logic  
469 appears to be fairly divergent. For example, during micrococcin maturation, Thz installation  
470 is separated from Ser dehydration by an obligatory C-terminal decarboxylation step,<sup>21</sup> and  
471 in thiomuracin biosynthesis, glutamyl transferase TbtB is highly selective for the overall  
472 azole pattern.<sup>20,58</sup> The *laz* BGC is also unique in its minimalistic size, unusual gene  
473 architecture (for instance, the fusion between glutamate elimination and dehydrogenase  
474 domains) and low sequence similarity to orthologous enzymes from other thiopeptide  
475 families.<sup>40</sup> Perhaps, lactazole-like thiopeptides evolved from a goadsporin-like linear  
476 azole/Dha-containing peptide<sup>59,60</sup> independently of other thiopeptide BGCs.

477 In summary, by identifying several control mechanisms responsible for integrity of  
478 lactazole assembly, this study begins to address how multiple promiscuous RiPP enzymes  
479 capable of competing over their substrate cooperatively modify it to converge on a single  
480 natural product. Our results rationalize the ability of *laz* BGC to synthesize diverse  
481 thiopeptides and inform on future bioengineering applications of Laz enzymes, including  
482 functional reprogramming of lactazole achieved by screening and *de novo* discovery of  
483 lactazole-inspired compounds from mRNA display libraries.

484

## 485 Acknowledgements

486 We thank Dr. Kazuya Teramoto and Dr. Takayuki Kuge for their help with protein  
487 expression. This work was supported by CREST for Molecular Technologies, JST to H.S.;  
488 KAKENHI (JP16H06444 to H.S. and Y.G. and H.O.; JP17H04762, JP18H04382,  
489 JP19K22243, and JP20H02866 to Y.G.) from the Japan Society for the Promotion of  
490 Science (JSPS); a grant-in-aid from the Institute for Fermentation, Osaka (IFO) to H.O.;  
491 Amano Enzyme, Inc. to H.O.; and the A3 Foresight Program, JSPS to H.O. DFT  
492 computations were performed using Research Center for Computational Science, Okazaki,  
493 Japan.

## 494 References

- 495 (1) Arnison, P. G.; Bibb, M. J.; Bierbaum, G.; Bowers, A. A.; Bugni, T. S.; Bulaj, G.;  
496 Camarero, J. A.; Campopiano, D. J.; Challis, G. L.; Clardy, J.; Cotter, P. D.; Craik, D.  
497 J.; Dawson, M.; Dittmann, E.; Donadio, S.; Dorrestein, P. C.; Entian, K.; Gruber, C.  
498 W.; Fischbach, M. A.; Garavelli, J. S.; Ulf, G.; Haft, D. H.; Hemscheidt, T. K.;  
499 Hertweck, C.; Hill, C.; Horswill, A. R.; Jaspars, M.; Kelly, W. L.; Klinman, J. P.;  
500 Kuipers, O. P.; Link, A. J.; Liu, W.; Marahiel, M. A.; Nair, S. K.; Mitchell, D. A.; Moll,  
501 G. N.; Moore, B. S.; Rolf, M.; Nes, I. F.; Norris, G. E.; Olivera, B. M.; Onaka, H.;  
502 Patchett, M. L.; Piel, J.; Reaney, M. J. T.; Ross, R. P.; Sahl, H.; Schmidt, E. W.;  
503 Selsted, M. E.; Severinov, K.; Shen, B.; Sivonen, K.; Smith, L.; Stein, T.; Tagg, J.  
504 R.; Tang, G.; Truman, A. W.; Vederas, J. C.; Walsh, C. T.; Walton, J. D.; Wenzel, S.  
505 C.; Willey, J. M.; van der Donk, W. A. Ribosomally Synthesized and Post-  
506 Translationally Modified Peptide Natural Products: Overview and Recommendations  
507 for a Universal Nomenclature. *Nat. Prod. Rep.* **2013**, *30*, 108–160.
- 508 (2) Freeman, M. F.; Helf, M. J.; Bhushan, A.; Morinaka, B. I.; Piel, J. Seven Enzymes  
509 Create Extraordinary Complexity in an Uncultivated Bacterium. *Nat. Chem.* **2016**, *9*,  
510 387–395.
- 511 (3) Freeman, M. F.; Gurgui, C.; Helf, M. J.; Morinaka, B. I.; Uria, A. R.; Oldham, N. J.;  
512 Sahl, H.; Matsunaga, S.; Piel, J. Metagenome Mining Reveals Polytheonamides as  
513 Posttranslationally Modified Ribosomal Peptides. *Science*. **2012**, *338*, 387–391.
- 514 (4) Yu, Y.; Mukherjee, S.; van der Donk, W. A. Product Formation by the Promiscuous  
515 Lanthipeptide Synthetase ProcM Is under Kinetic Control. *J. Am. Chem. Soc.* **2015**,  
516 *137*, 5140–5148.
- 517 (5) Tang, W.; Jiménez-Osés, G.; Houk, K. N.; van der Donk, W. A. Substrate Control in  
518 Stereoselective Lanthionine Biosynthesis. *Nat. Chem.* **2015**, *7*, 57–64.
- 519 (6) Thibodeaux, C. J.; Ha, T.; van der Donk, W. A. A Price to Pay for Relaxed Substrate  
520 Specificity: A Comparative Kinetic Analysis of the Class II Lanthipeptide  
521 Synthetases ProcM and HalM2. *J. Am. Chem. Soc.* **2014**, *136*, 17513–17529.



- 522 (7) Habibi, Y.; Uggowitz, K. A.; Issak, H.; Thibodeaux, C. J. Insights into the Dynamic  
523 Structural Properties of a Lanthipeptide Synthetase Using Hydrogen–Deuterium  
524 Exchange Mass Spectrometry. *J. Am. Chem. Soc.* **2019**, *141*, 14661–14672.
- 525 (8) Kelleher, N. L.; Belshaw, P. J.; Walsh, C. T. Regioselectivity and Chemoselectivity  
526 Analysis of Oxazole and Thiazole Ring Formation by the Peptide-Heterocyclizing  
527 Microcin B17 Synthetase Using High-Resolution MS/MS. *J. Am. Chem. Soc.* **1998**,  
528 *120*, 9716–9717.
- 529 (9) Gao, S.; Ge, Y.; Bent, A. F.; Schwarz-Linek, U.; Naismith, J. H. Oxidation of the  
530 Cyanobactin Precursor Peptide Is Independent of the Leader Peptide and Operates  
531 in a Defined Order. *Biochemistry* **2018**, *57*, 5996–6002.
- 532 (10) van der Velden, N. S.; Kälin, N.; Helf, M. J.; Piel, J.; Freeman, M. F.; Künzler, M.  
533 Autocatalytic Backbone N-Methylation in a Family of Ribosomal Peptide Natural  
534 Products. *Nat. Chem. Biol.* **2017**, *13*, 833–835.
- 535 (11) Koehnke, J.; Bent, A. F.; Zollman, D.; Smith, K.; Houssen, W. E.; Zhu, X.; Mann, G.;  
536 Lebl, T.; Scharff, R.; Shirran, S.; Botting, C. H.; Jaspars, M.; Schwarz-linek, U.;  
537 Naismith, J. H. The Cyanobactin Heterocyclase Enzyme: A Processive Adenylase  
538 That Operates with a Defined Order of Reaction. *Angew. Chem., Int. Ed.* **2013**, *52*,  
539 13991–13996.
- 540 (12) Jungmann, N. A.; Krawczyk, B.; Tietzmann, M.; Ensle, P.; Süssmuth, R. D.  
541 Dissecting Reactions of Nonlinear Precursor Peptide Processing of the Class III  
542 Lanthipeptide Curvopeptin. *J. Am. Chem. Soc.* **2014**, *136*, 15222–15228.
- 543 (13) Krawczyk, B.; Ensle, P.; Müller, W. M.; Süssmuth, R. D. Deuterium Labeled  
544 Peptides Give Insights into the Directionality of Class III Lantibiotic Synthetase  
545 LabKC. *J. Am. Chem. Soc.* **2012**, *134*, 9922–9925.
- 546 (14) Dong, S.-H.; Liu, A.; Mahanta, N.; Mitchell, D. A.; Nair, S. K. Mechanistic Basis for  
547 Ribosomal Peptide Backbone Modifications. *ACS Cent. Sci.* **2019**, *5*, 842–851.
- 548 (15) Burkhart, B. J.; Hudson, G. A.; Dunbar, K. L.; Mitchell, D. A. A Prevalent Peptide-  
549 Binding Domain Guides Ribosomal Natural Product Biosynthesis. *Nat. Chem. Biol.*  
550 **2015**, *11*, 564–570.
- 551 (16) Sikandar, A.; Franz, L.; Melse, O.; Antes, I.; Koehnke, J. Thiazoline-Specific  
552 Amidohydrolase PurAH Is the Gatekeeper of Botromycin Biosynthesis. *J. Am.*  
553 *Chem. Soc.* **2019**, *141*, 9748–9752.
- 554 (17) Travin, D. Y.; Metelev, M.; Serebryakova, M.; Komarova, E. S.; Osterman, I. A.;  
555 Ghilarov, D.; Severinov, K. Biosynthesis of Translation Inhibitor Klebsazolicin  
556 Proceeds through Heterocyclization and N-Terminal Amidine Formation Catalyzed  
557 by a Single YcaO Enzyme. *J. Am. Chem. Soc.* **2018**, *140*, 5625–5633.
- 558 (18) Ghilarov, D.; Stevenson, C. E. M.; Travin, D. Y.; Piskunova, J.; Serebryakova, M.;  
559 Maxwell, A.; Lawson, D. M.; Severinov, K. Architecture of Microcin B17 Synthetase:  
560 An Octameric Protein Complex Converting a Ribosomally Synthesized Peptide into  
561 a DNA Gyrase Poison. *Mol. Cell* **2019**, *73*, 749-762.e5.
- 562 (19) Badding, E. D.; Grove, T. L.; Gadsby, L. K.; LaMattina, J. W.; Boal, A. K.; Booker, S.  
563 J. Rerouting the Pathway for the Biosynthesis of the Side Ring System of  
564 Nosiheptide: The Roles of NosI, NosJ, and NosK. *J. Am. Chem. Soc.* **2017**, *139*,

- 565 5896–5905.
- 566 (20) Zhang, Z.; Hudson, G. A.; Mahanta, N.; Tietz, J. I.; van der Donk, W. A.; Mitchell, D.  
567 A. Biosynthetic Timing and Substrate Specificity for the Thiopeptide Thiomuracin. *J.*  
568 *Am. Chem. Soc.* **2016**, *138*, 15511–15514.
- 569 (21) Bewley, K. D.; Bennallack, P. R.; Burlingame, M. A.; Robison, R. A.; Griffiths, J. S.;  
570 Miller, S. M. Capture of Micrococcin Biosynthetic Intermediates Reveals C-Terminal  
571 Processing as an Obligatory Step for in Vivo Maturation. *Proc. Natl. Acad. Sci. U. S.*  
572 *A.* **2016**, *113*, 12450–12455.
- 573 (22) Huo, L.; Ökesli, A.; Zhao, M.; van der Donk, W. A. Insights into the Biosynthesis of  
574 Duramycin. *Appl. Environ. Microbiol.* **2017**, *83*, e02698-16.
- 575 (23) Du, Y.; Qiu, Y.; Meng, X.; Feng, J.; Tao, J.; Liu, W. A Heterotrimeric Dehydrogenase  
576 Complex Functions with 2 Distinct YcaO Proteins to Install 5 Azole Heterocycles  
577 into 35-Membered Sulfomycin Thiopeptides. *J. Am. Chem. Soc.* **2020**, *142*, 8454–  
578 8463.
- 579 (24) Hayashi, S.; Ozaki, T.; Asamizu, S.; Ikeda, H.; Omura, S.; Oku, N.; Igarashi, Y.;  
580 Tomoda, H.; Onaka, H. Genome Mining Reveals a Minimum Gene Set for the  
581 Biosynthesis of 32-Membered Macrocyclic Thiopeptides Lactazoles. *Chem. Biol.*  
582 **2014**, *21*, 679–688.
- 583 (25) Burkhart, B. J.; Schwalen, C. J.; Mann, G.; Naismith, J. H.; Mitchell, D. A. YcaO-  
584 Dependent Posttranslational Amide Activation: Biosynthesis, Structure, and  
585 Function. *Chem. Rev.* **2017**, *117*, 5389–5456.
- 586 (26) Koehnke, J.; Mann, G.; Bent, A. F.; Ludewig, H.; Shirran, S.; Botting, C.; Lebl, T.;  
587 Houssen, W. E.; Jaspars, M.; Naismith, J. H. Structural Analysis of Leader Peptide  
588 Binding Enables Leader-Free Cyanobactin Processing. *Nat. Chem. Biol.* **2015**, *11*,  
589 558–563.
- 590 (27) Dunbar, K. L.; Tietz, J. I.; Cox, C. L.; Burkhart, B. J.; Mitchell, D. A. Identification of  
591 an Auxiliary Leader Peptide-Binding Protein Required for Azoline Formation in  
592 Ribosomal Natural Products. *J. Am. Chem. Soc.* **2015**, *137*, 7672–7677.
- 593 (28) Li, Y.-M.; Milne, J. C.; Madison, L. L.; Kolter, R.; Walsh, C. T. From Peptide  
594 Precursors to Oxazole and Thiazole-Containing Peptide Antibiotics: Microcin B17  
595 Synthase. *Science.* **1995**, *274*, 1188–1193.
- 596 (29) Moutiez, M.; Belin, P.; Gondry, M. Aminoacyl-tRNA-Utilizing Enzymes in Natural  
597 Product Biosynthesis. *Chem. Rev.* **2017**, *117*, 5578–5618.
- 598 (30) Ortega, M. A.; Hao, Y.; Zhang, Q.; Walker, M. C.; van der Donk, W. A.; Nair, S. K.  
599 Structure and Mechanism of the tRNA-Dependent Lantibiotic Dehydratase NisB.  
600 *Nature* **2015**, *517*, 509–512.
- 601 (31) Repka, L. M.; Chekan, J. R.; Nair, S. K.; van der Donk, W. A. Mechanistic  
602 Understanding of Lanthipeptide Biosynthetic Enzymes. *Chem. Rev.* **2017**, *117*,  
603 5457–5520.
- 604 (32) Ozaki, T.; Kurokawa, Y.; Hayashi, S.; Oku, N.; Asamizu, S.; Igarashi, Y.; Onaka, H.  
605 Insights into the Biosynthesis of Dehydroalaninesin Goadsporin. *ChemBioChem*  
606 **2016**, *17*, 218–223.

- 607 (33) Wever, W. J.; Bogart, J. W.; Bowers, A. A. Identification of Pyridine Synthase  
608 Recognition Sequences Allows a Modular Solid-Phase Route to Thiopeptide  
609 Variants. *J. Am. Chem. Soc.* **2016**, *138*, 13461–13464.
- 610 (34) Cogan, D. P.; Hudson, G. A.; Zhang, Z.; Pogorelov, T. V.; van der Donk, W. A.;  
611 Mitchell, D. A.; Nair, S. K. Structural Insights into Enzymatic [4+2] Aza-  
612 Cycloaddition in Thiopeptide Antibiotic Biosynthesis. *Proc. Natl. Acad. Sci. U. S. A.*  
613 **2017**, *114*, 12928–12933.
- 614 (35) Goto, Y.; Katoh, T.; Suga, H. Flexizymes for Genetic Code Reprogramming. *Nat.*  
615 *Protoc.* **2011**, *6*, 779–790.
- 616 (36) Vinogradov, A. A.; Shimomura, M.; Goto, Y.; Sugai, Y.; Suga, H.; Onaka, H. Minimal  
617 Lactazole Scaffold for in Vitro Thiopeptide Bioengineering. *Nat. Commun.* **2020**, *11*,  
618 2272.
- 619 (37) Tocchetti, A.; Maffioli, S.; Iorio, M.; Alt, S.; Mazzei, E.; Brunati, C.; Sosio, M.;  
620 Donadio, S. Capturing Linear Intermediates and C-Terminal Variants during  
621 Maturation of the Thiopeptide GE2270. *Chem. Biol.* **2013**, *20*, 1067–1077.
- 622 (38) Hudson, G. A.; Mitchell, D. A. RiPP Antibiotics: Biosynthesis and Engineering  
623 Potential. *Curr. Opin. Microbiol.* **2018**, *45*, 61–69.
- 624 (39) Goto, Y.; Suga, H. Engineering of RiPP Pathways for the Production of Artificial  
625 Peptides Bearing Various Non-Proteinogenic Structures. *Curr. Opin. Chem. Biol.*  
626 **2018**, *46*, 82–90.
- 627 (40) Schwalen, C. J.; Hudson, G. A.; Kille, B.; Mitchell, D. A. Bioinformatic Expansion  
628 and Discovery of Thiopeptide Antibiotics. *J. Am. Chem. Soc.* **2018**, *140*, 9494–9501.
- 629 (41) Mcintosh, J. A.; Donia, M. S.; Schmidt, E. W. Insights into Heterocyclization from  
630 Two Highly Similar Enzymes. *J. Am. Chem. Soc.* **2010**, *132*, 4089–4091.
- 631 (42) Goto, Y.; Ito, Y.; Kato, Y.; Tsunoda, S.; Suga, H. One-Pot Synthesis of Azoline-  
632 Containing Peptides in a Cell-Free Translation System Integrated with a  
633 Posttranslational Cyclodehydratase. *Chem. Biol.* **2014**, *21*, 766–774.
- 634 (43) Ge, Y.; Czekster, C. M.; Miller, O. K.; Botting, C. H.; Schwarz-Linek, U.; Naismith, J.  
635 H. Insights into the Mechanism of the Cyanobactin Heterocyclase Enzyme.  
636 *Biochemistry* **2019**, *58*, 2125–2132.
- 637 (44) Schmidt, E. W.; Nelson, J. T.; Rasko, D. A.; Sudek, S.; Eisen, J. A.; Haygood, M.  
638 G.; Ravel, J. Patellamide A and C Biosynthesis by a Microcin-like Pathway in  
639 Prochloron Didemni, the Cyanobacterial Symbiont of Lissoclinum Patella. *Proc.*  
640 *Natl. Acad. Sci. U. S. A.* **2005**, *102*, 7315–7320.
- 641 (45) Karlsson, C.; Jansson, E.; Strømme, M.; Sjödin, M. Computational  
642 Electrochemistry Study of 16 Isoindole-4,7-Diones as Candidates for Organic  
643 Cathode Materials. *J. Phys. Chem. C* **2011**, *116*, 3793–3801.
- 644 (46) Jang, Y. H.; Sowers, L. C.; Tahir, C.; Goddard III, W. A. First Principles Calculation  
645 of pKa Values for 5-Substituted Uracils. *J. Phys. Chem. A* **2001**, *105*, 274–280.
- 646 (47) Baik, M.; Friesner, R. A. Computing Redox Potentials in Solution: Density  
647 Functional Theory as a Tool for Rational Design of Redox Agents. *J. Phys. Chem. A*  
648 **2002**, *106*, 7407–7412.

- 649 (48) Balaban, A. T.; Oniciu, D. C.; Katritzky, A. R. Aromaticity as a Cornerstone of  
650 Heterocyclic Chemistry. *Chem. Rev.* **2004**, No. 104, 2777–2812.
- 651 (49) Massey, V. A Simple Method for the Determination of Redox Potentials. In *In*  
652 *Flavins and Flavoproteins* (Curti, B., Ronchi, S., and Zanetti, G., Eds.); Walter de  
653 Gruyter, New York, 1990; pp 59–66.
- 654 (50) Christgen, S. L.; Becker, S. M.; Becker, D. F. Methods for Determining the  
655 Reduction Potentials of Flavin Enzymes. *Methods Enzymol.* **2019**, 620, 1–25.
- 656 (51) Melby, J. O.; Li, X.; Mitchell, D. A. Orchestration of Enzymatic Processing by  
657 Thiazole/Oxazole-Modified Microcin Dehydrogenases. *Biochemistry* **2014**, 53, 413–  
658 422.
- 659 (52) Just-Baringo, X.; Albericio, F.; Alvarez, M. Thiopeptide Engineering: A  
660 Multidisciplinary Effort towards Future Drugs. *Angew. Chem., Int. Ed.* **2014**, 53,  
661 6602–6616.
- 662 (53) Bagley, M. C.; Dale, J. W.; Merritt, E. A.; Xiong, X. Thiopeptide Antibiotics. *Chem.*  
663 *Rev.* **2005**, 105, 685–714.
- 664 (54) Malcolmson, S. J.; Young, T. S.; Ruby, J. G.; Skewes-Cox, P.; Walsh, C. T. The  
665 Posttranslational Modification Cascade to the Thiopeptide Berninamycin Generates  
666 Linear Forms and Altered Macrocyclic Scaffolds. *Proc. Natl. Acad. Sci. U. S. A.*  
667 **2013**, 110, 9483–8488.
- 668 (55) Sikandar, A.; Koehnke, J. The Role of Protein–Protein Interactions in the  
669 Biosynthesis of Ribosomally Synthesized and Post-Translationally Modified  
670 Peptides. *Nat. Prod. Rep.* **2019**, 36, 1576–1588.
- 671 (56) Kuipers, A.; Meijer-Wierenga, J.; Rink, R.; Kluskens, L. D.; Moll, G. N. Mechanistic  
672 Dissection of the Enzyme Complexes Involved in Biosynthesis of Lacticin 3147 and  
673 Nisin. *Appl. Environ. Microbiol.* **2008**, 74, 6591–6597.
- 674 (57) An, L.; Cogan, D. P.; Navo, C. D.; Jiménez-Osés, G.; Nair, S. K.; van der Donk, W.  
675 A. Substrate-Assisted Enzymatic Formation of Lysinoalanine in Duramycin. *Nat.*  
676 *Chem. Biol.* **2018**, 14, 928–933.
- 677 (58) Hudson, G. A.; Zhang, Z.; Tietz, J. I.; Mitchell, D. A.; van der Donk, W. A. In Vitro  
678 Biosynthesis of the Core Scaffold of the Thiopeptide Thiomuracin. *J. Am. Chem.*  
679 *Soc.* **2015**, 137, 16012–16015.
- 680 (59) Onaka, H.; Nakaho, M.; Hayashi, K.; Igarashi, Y.; Furumai, T. Cloning and  
681 Characterization of the Goadsporin Biosynthetic Gene Cluster from *Streptomyces*  
682 *Sp.* TP-A0584. *Microbiology* **2005**, 151, 3923–3933.
- 683 (60) Ozaki, T.; Yamashita, K.; Goto, Y.; Shimomura, M.; Hayashi, S.; Asamizu, S.; Sugai,  
684 Y.; Ikeda, H.; Suga, H.; Onaka, H. Dissection of Goadsporin Biosynthesis by in Vitro  
685 Reconstitution Leading to Designer Analogues Expressed in Vivo. *Nat. Commun.*  
686 **2017**, 8, 14207.
- 687
